# Supplementary material for: The Relationship Between China’s “Double Reduction” Policy and Educational Anxiety Among Rural Middle School Parents: The Mediating Role of Satisfaction with Home-School Collaboration
Source: Research Square preprint supplement (doi:10.21203/rs.3.rs-7042380/v1), 2025-08-07
Supplement: Supplementary file 1 [file 87e93dd02171b96fc48c1b3a.docx]

**Parental perceptions of the DR policy scale**

|  | completely not in line | somewhat not in line | neutral | somewhat in line | completely in line |
| --- | --- | --- | --- | --- | --- |
| aa1.I believe that the 'Double Reduction' policy is fair and just |  |  |  |  |  |
| aa2.I have great confidence in the role of 'Double Reduction' policy in alleviating the excessive academic burden of primary and secondary school students and promoting their healthy development |  |  |  |  |  |
| aa3.After the implementation of the 'Double Reduction' policy , I think teachers pay more attention to children's learning |  |  |  |  |  |
| aa4.I think the 'Double Reduction' policy has eased my anxiety about my children's education |  |  |  |  |  |
| aa5.I am very satisfied with the implementation of the 'Double Reduction' policy in schools |  |  |  |  |  |
| aa6.According to my understanding, the parents around me have a high degree of approval for the implementation of 'Double Reduction' policy by the Education Department (ED) |  |  |  |  |  |
| ab1.After the implementation of the 'Double Reduction' policy, my children are too lazy in learning |  |  |  |  |  |
| ab2.After the implementation of the 'Double Reduction' policy, I think schools still use academic performance as the primary criterion for evaluating children |  |  |  |  |  |
| ab3.The 'Double Reduction' policy has reduced the financial burden of my child's education |  |  |  |  |  |
| ab4.After the implementation of 'Double Reduction' policy, I worry because my child doesn't attend targeted extracurricular classes |  |  |  |  |  |
